# Supplementary material for: Tailoring of Mesoporous Silica-Based Materials for Enhanced Water Pollutants Removal
Source: MDPI journal article supplement (doi:10.3390/molecules28104038), 2023-05-11
Supplement: s1 [file s1]

# ELECTRONIC SUPPORTING INFORMATION

## Tailoring of Mesoporous Silica-Based Materials for Enhanced Water Pollutants Removal

Daniela Flores,<sup>1</sup> C. Marisa R. Almeida,<sup>2</sup> Carlos Rocha Gomes,<sup>2</sup> Salette S. Balula,<sup>1</sup> Carlos M. Granadeiro<sup>1,\*</sup>

<sup>1</sup>LAQV-REQUIMTE, Departamento de Química e Bioquímica, Faculdade de Ciências, Universidade do Porto, Rua do Campo Alegre, s/n 4169-007 Porto, Portugal

<sup>2</sup>Centro Interdisciplinar de Investigação Marinha e Ambiental (CIIMAR), Universidade do Porto, Terminal de Cruzeiros do Porto de Leixões, Av. General Norton de Matos s/n, 4450-208 Matosinhos, Portugal and Departamento de Química e Bioquímica, Faculdade de Ciências, Universidade do Porto, Rua do Campo Alegre, 687, 4169-007 Porto, Portugal

**Table S1.** Assignment of the vibrational FT-IR bands of the mesoporous silica materials.

| Material    | $\nu_s(\text{C-H})$ | $\delta(\text{N-H})$ | $\nu_{as}(\text{Si-O-Si})$ | $\nu_s(\text{Si-O-Si})$ | $\delta(\text{O-Si-O})$ |
|-------------|---------------------|----------------------|----------------------------|-------------------------|-------------------------|
| MSNP        | -                   | -                    | 1078                       | 794                     | 456                     |
| MSNP-APTES  | 2929                | 1558                 | 1074                       | 795                     | 461                     |
| MSNP-TESPIC | 2980; 2931          | 1574                 | 1074                       | 800                     | 455                     |
| LPMS        | -                   | -                    | 1076                       | 805                     | 456                     |
| LPMS-APTES  | 2958                | 1558                 | 1105                       | 808                     | 471                     |
| LPMS-TESPIC | 2989                | 1541                 | 1103                       | 808                     | 471                     |

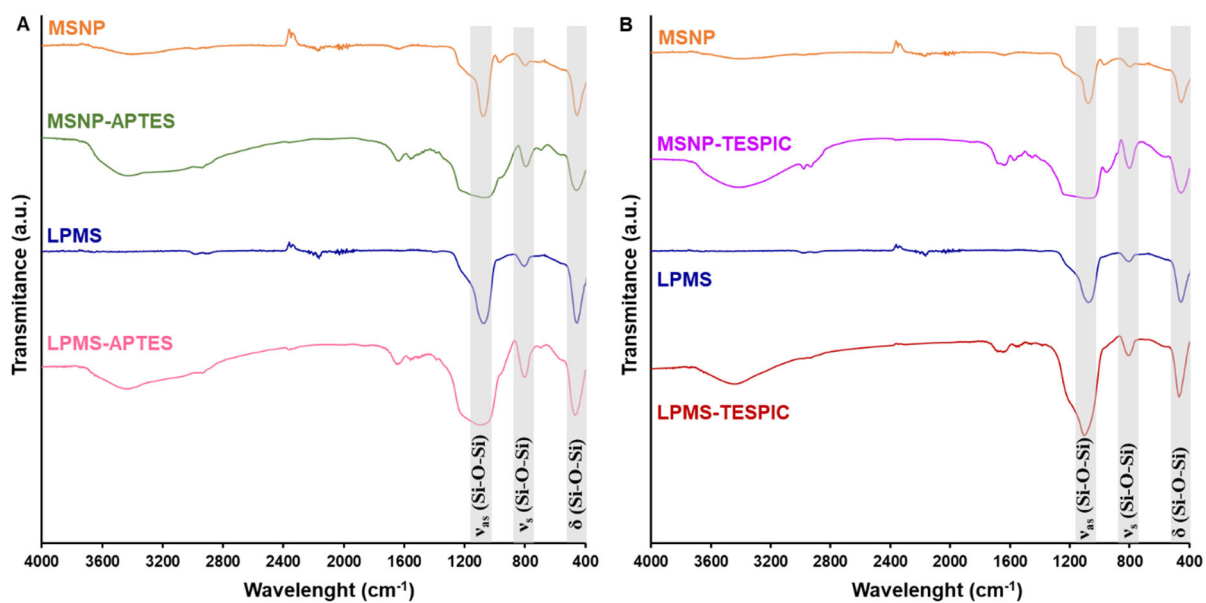

**Figure S1.** FT-IR spectra of (A) APTES-functionalized and (B) TESPIC-functionalized MSNP and LPMS mesoporous silica materials. See the Experimental section for materials abbreviation meaning.

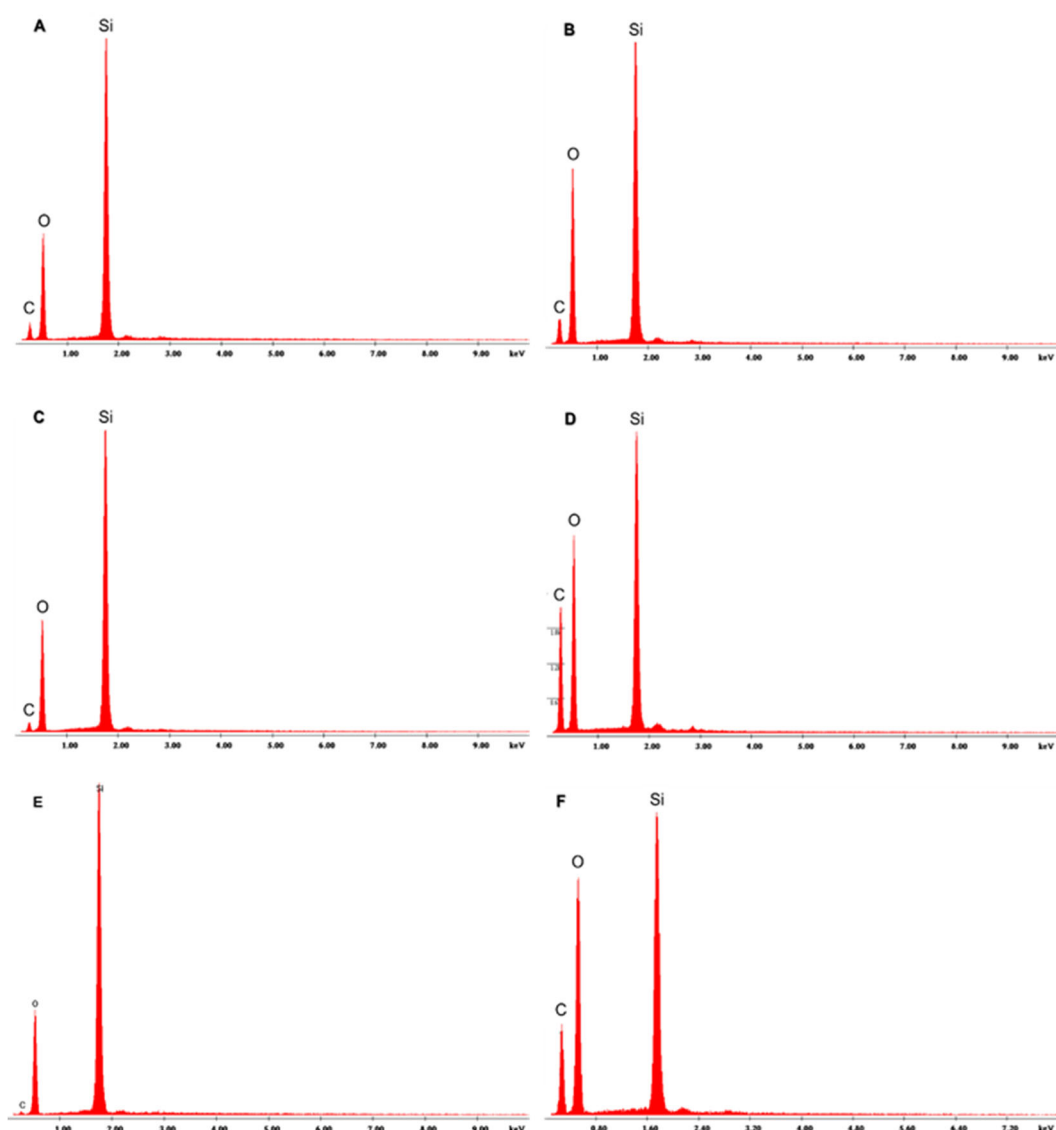

**Figure S2.** Energy-dispersive X-ray spectroscopy spectra of (A) MSNP, (B) LPMS, (C) MSNP-APTES, (D) LPMS-APTES, (E) MSNP-TESPIC and (F) LPMS-TESPIC. See the Experimental section for materials abbreviation meaning.

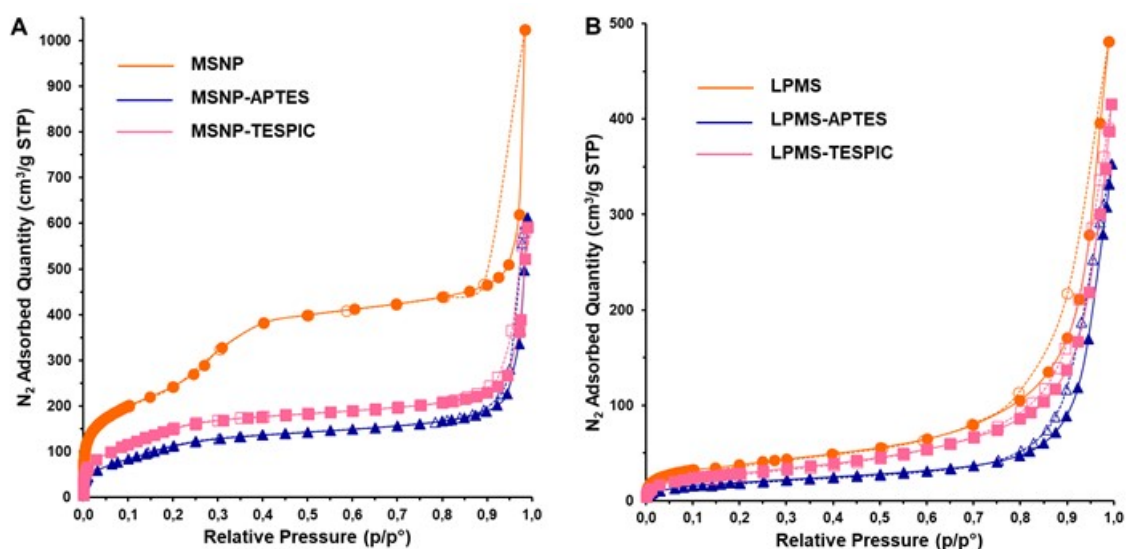

**Figure S3.** Nitrogen adsorption-desorption isotherms at -196 °C of (A) MSNP and (B) LPMS materials, before and after functionalization. Filled and unfilled symbols represent the adsorption and desorption of nitrogen, respectively. See the Experimental section for materials abbreviation meaning.

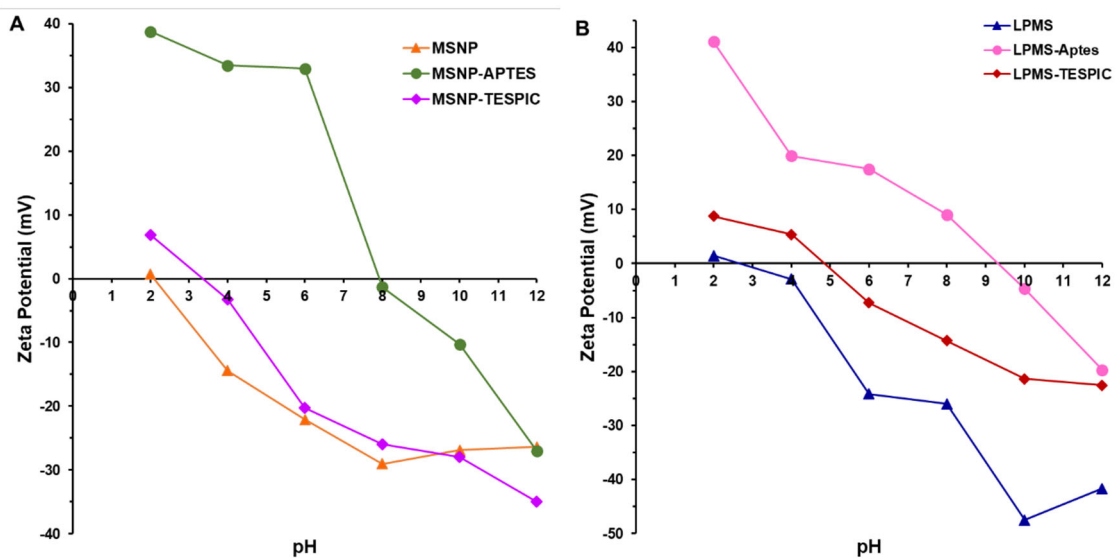

**Figure S4.** Zeta potential values for (A) MSNP-type materials and (B) LPMS-type materials in the 2-12 pH range. See the Experimental section for materials abbreviation meaning.

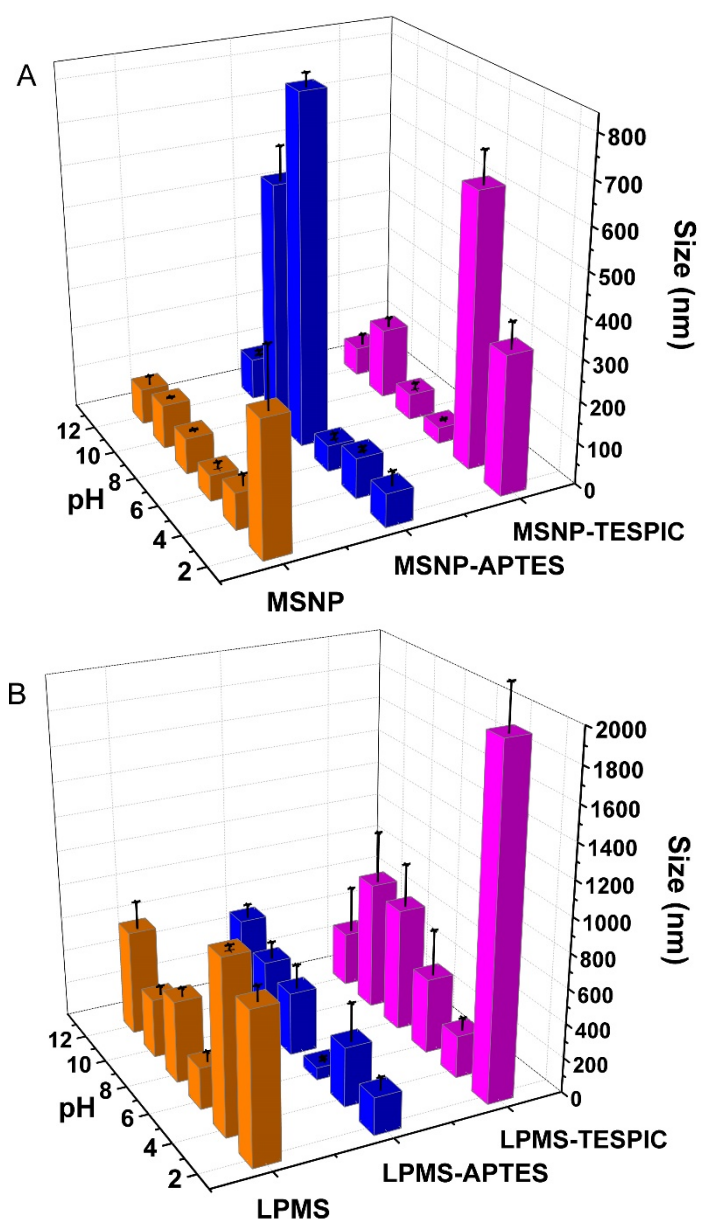

**Figure S5.** Hydrodynamic sizes determined by DLS of the (A) MSNP-type and (B) LPMS-type materials in the 2-12 pH range. See the Experimental section for materials abbreviation meaning.

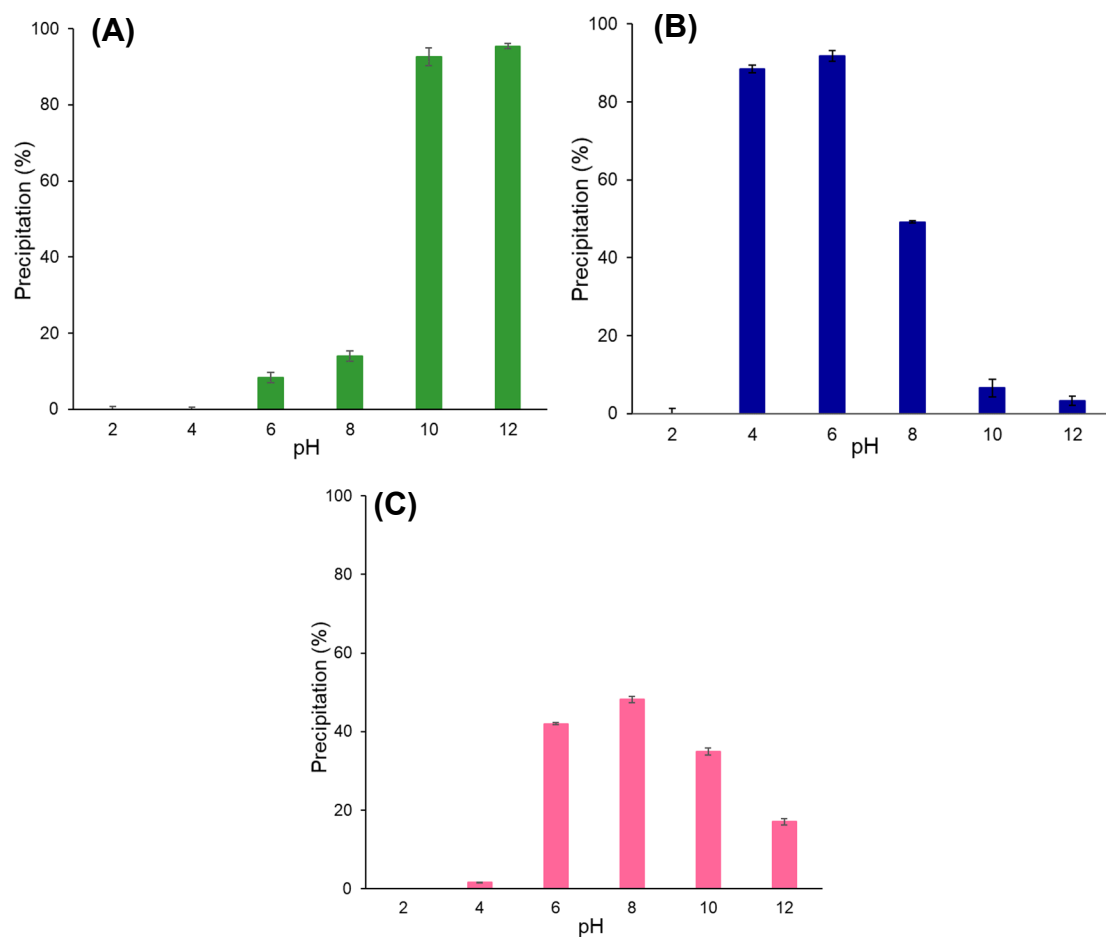

**Figure S6.** Precipitation percentage in blank experiments for (A)  $\text{Ni}^{2+}$ , (B)  $\text{Fe}^{3+}$  and (C)  $\text{Cu}^{2+}$  over the 2-12 pH range. Mean and standard ( $n=3$ ) are shown.

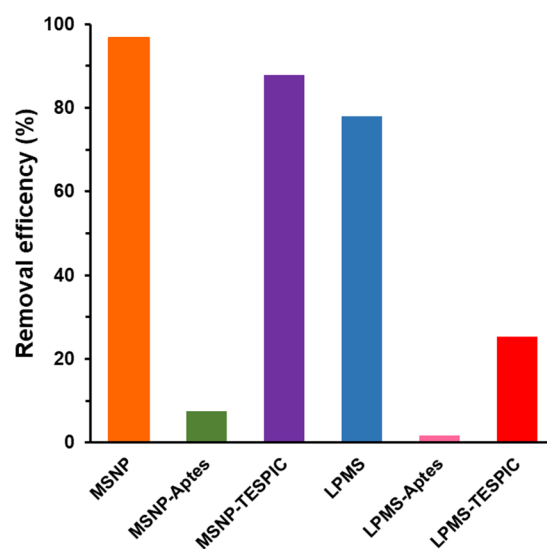

**Figure S7.** Removal efficiency for methylene blue (5 mg/L) by the mesoporous silica materials (0.5 g/L) with contact time of 2 h at room temperature. Mean and standard ( $n=3$ ) are shown. See the Experimental section for materials abbreviation meaning.

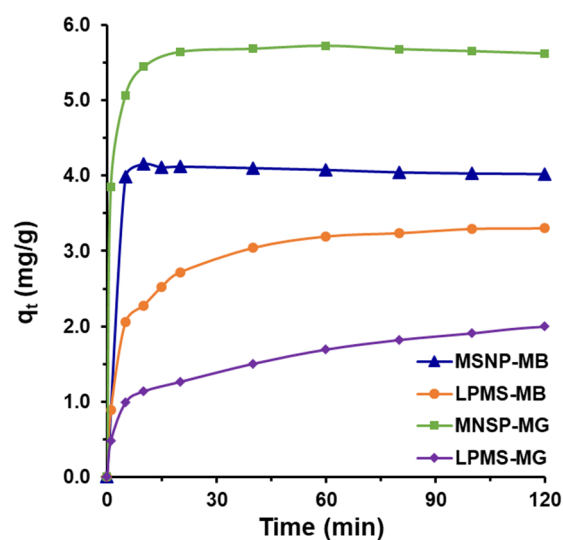

**Figure S8.** Effect of contact time on the adsorption of methylene blue (MB) and methyl green (MG) (5 mg/L) by MSNP and LPMS materials (1.0 g/L). See the Experimental section for materials abbreviation meaning.

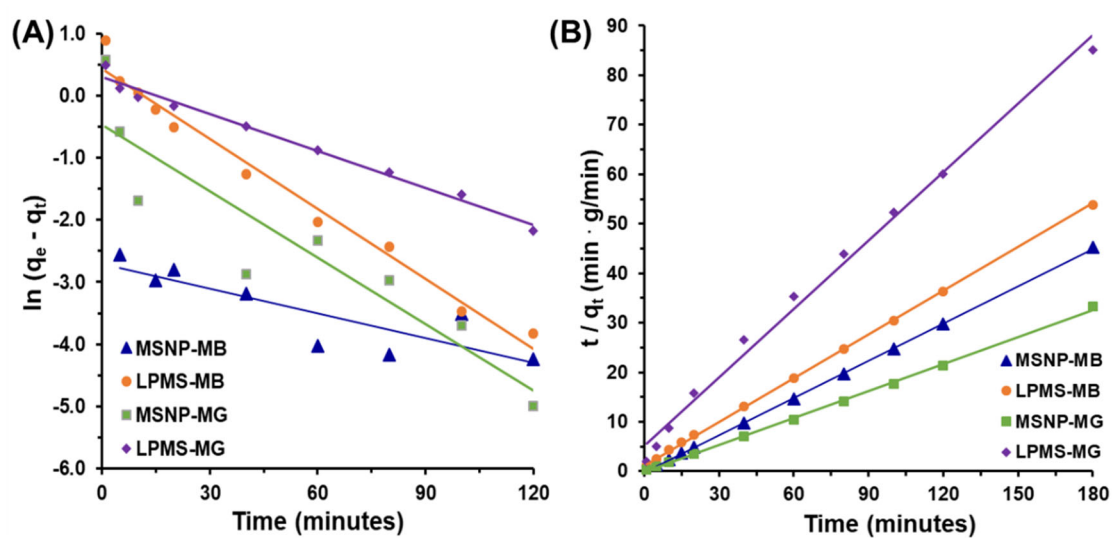

**Figure S9.** (A) Pseudo-first-order and (B) Pseudo-second-order kinetics model for the adsorption of organic dyes (methylene blue MB and methyl green MG) using MSNP and LPMS materials. See the Experimental section for materials abbreviation meaning.

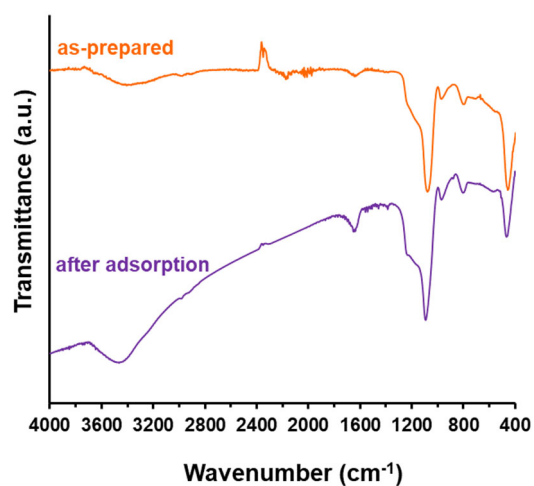

**Figure S10.** FT-IR spectra of the as-prepared MSNP material and after adsorption studies with methylene blue.

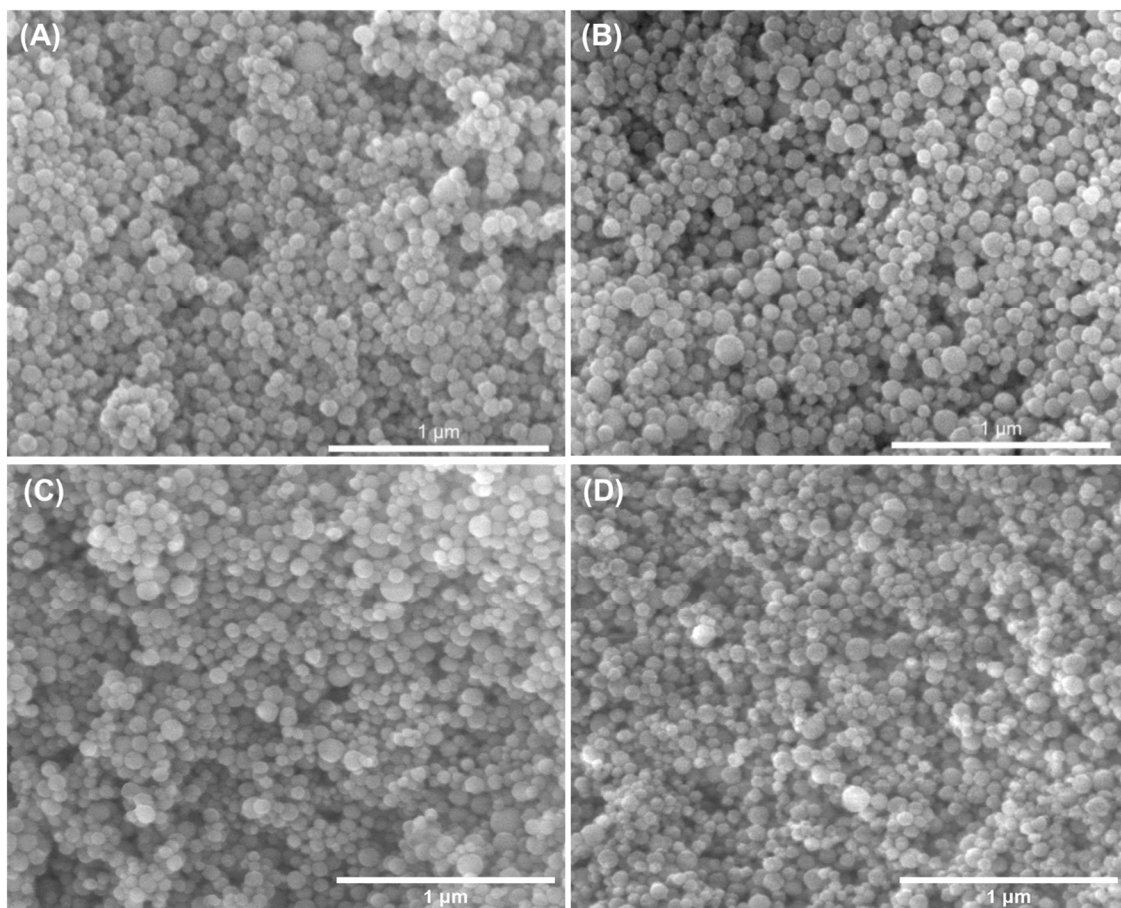

**Figure S11.** SEM micrographs of MSNP material after the first cycle with methylene blue (A) and methyl green (B), and after the third adsorption cycle with methylene blue (C) and methyl green (D).
